# Supplementary material
Source: HighWire-hosted journal article supplement (http://heart.bmjjournals.com/highwire/filestream/125325/field_highwire_adjunct_files/0/HEART_DATA_FIGURES_215046.pdf)

## Supplementary data

## Additional details concerning study assessment and selection.

Twenty-one candidate trials were identified for further assessment. [1, 2, 3, 4, 5, 6, 7, 8, 9, 10, 11, 12, 13, 14, 15, 16, 17, 18, 19, 20, 21]

Six studies that were discarded as they were not focused on therapy with statins. [11, 12, 14, 15, 16, 17]

On further examination of these 15 remaining studies, 5 were excluded either because they did not report any extractable data, [7, 19, 21] because of possible duplicate publication,[5] or because they were focused on rheumatic aortic stenosis.[4]

Of the 10 studies finally selected for meta-analysis, 5 were prospective,[1, 2, 3, 10, 20], 5 retrospective,[6, 8, 9, 13, 18] whereas 3 were randomized,[1, 3, 20] and 7 not randomized,[2, 6, 8, 9, 10, 13, 18] respectively.

Finally, only three studies enrolled patients with average LDL cholesterol levels  $\leq 130$  mg/dL; of these, 2 were prospective [10, 20] and one retrospective [13].

## ADDITIONAL REFERENCES

- 1 Cowell SJ, Newby DE, Prescott RJ, et al. A randomized trial of intensive lipid-lowering therapy in calcific aortic stenosis. *N Engl J Med* 2005;352:2389-97.
- 2 Moura LM, Ramos SF, Zamorano JL, et al. Rosuvastatin affecting aortic valve endothelium to slow the progression of aortic stenosis. *J Am Coll Cardiol* 2007;49:554-61.
- 3 Rossebø AB, Pedersen TR, Boman K, et al. Intensive lipid lowering with simvastatin and ezetimibe in aortic stenosis. *N Engl J Med* 2008;359:1343-56.
- 4 Antonini-Canterin F, Leballi E, Enache R, et al. Hydroxymethylglutaryl coenzyme-a reductase inhibitors delay the progression of rheumatic aortic valve stenosis a long-term echocardiographic study. *J Am Coll Cardiol* 2009;53:1874-9.
- 5 Antonini-Canterin F, Popescu BA, Huang G, et al. Progression of aortic valve sclerosis and aortic valve stenosis: what is the role of statin treatment? *Ital Heart J* 2005;6:119-24.
- 6 Antonini-Canterin F, Hirsu M, Popescu BA, et al. Stage-related effect of statin treatment on the progression of aortic valve sclerosis and stenosis. *Am J Cardiol* 2008;102:738-42.
- 7 Aronow WS, Ahn C, Kronzon I, et al. Association of coronary risk factors and use of statins with progression of mild valvular aortic stenosis in older persons. *Am J Cardiol* 2001;88:693-5.
- 8 Bellamy MF, Pellikka PA, Klarich KW, et al. Association of cholesterol levels, hydroxymethylglutaryl coenzyme-A reductase inhibitor treatment, and progression of aortic stenosis in the community. *J Am Coll Cardiol* 2002;40:1723-30.
- 9 Kuwabara M, Kitaoka H, Okawa M, et al. Treatment with HMG-CoA reductase inhibitors (statins) attenuates the progression of aortic valve stenosis in the elderly. *Geriatr Gerontol Int* 2006;6:124-8.
- 10 Mohler ER, 3rd, Wang H, Medenilla E, et al. Effect of statin treatment on aortic valve and coronary artery calcification. *J Heart Valve Dis* 2007;16:378-86.
- 11 Nassimiha D, Aronow WS, Ahn C, et al. Rate of progression of valvular aortic stenosis in patients  $\geq 60$  years of age. *Am J Cardiol* 2001;87:807-9, A9.
- 12 Nassimiha D, Aronow WS, Ahn C, et al. Association of coronary risk factors with progression of valvular aortic stenosis in older persons. *Am J Cardiol* 2001;87:1313-4.
- 13 Novaro GM, Tiong IY, Pearce GL, et al. Effect of hydroxymethylglutaryl coenzyme a reductase inhibitors on the progression of calcific aortic stenosis. *Circulation* 2001;104:2205-9.

- 14 O'Brien KD, Probstfield JL, Caulfield MT, et al. Angiotensin-converting enzyme inhibitors and change in aortic valve calcium. *Arch Intern Med* 2005;165:858-62.
- 15 O'Brien KD, Zhao XQ, Shavelle DM, et al. Hemodynamic effects of the angiotensin-converting enzyme inhibitor, ramipril, in patients with mild to moderate aortic stenosis and preserved left ventricular function. *J Investig Med* 2004;52:185-91.
- 16 Palta S, Pai AM, Gill KS, et al. New insights into the progression of aortic stenosis: implications for secondary prevention. *Circulation* 2000;101:2497-502.
- 17 Pohle K, Maffert R, Ropers D, et al. Progression of aortic valve calcification: association with coronary atherosclerosis and cardiovascular risk factors. *Circulation* 2001;104:1927-32.
- 18 Rosenhek R, Rader F, Loho N, et al. Statins but not angiotensin-converting enzyme inhibitors delay progression of aortic stenosis. *Circulation* 2004;110:1291-5.
- 19 Shavelle DM, Takasu J, Budoff MJ, et al. HMG CoA reductase inhibitor (statin) and aortic valve calcium. *Lancet* 2002;359:1125-6.
- 20 Chan KL, Teo K, Dumesnil JG, et al. Effect of Lipid Lowering With Rosuvastatin on Progression of Aortic Stenosis. Results of the Aortic Stenosis Progression Observation: Measuring Effects of Rosuvastatin (ASTRONOMER) Trial *Circulation* 2010;121  
306-14.
- 21 Dichtl W, Alber HF, Feuchtner GM, et al. Prognosis and risk factors in patients with asymptomatic aortic stenosis and their modulation by atorvastatin (20 mg). *Am J Cardiol* 2008;102:743-8.

## Legend to eFigure

eFigure 1: Meta-analysis of studies (denoted by first author and publication year) assessing the effect of statin treatment on death from any cause at follow-up (panel A, Odds Ratio and 95% confidence intervals), death from cardiovascular causes at follow-up (panel B, Odds Ratio and 95% confidence intervals), need to undergo aortic valve surgery at follow-up (panel C, Odds Ratio and 95% confidence intervals), peak aortic-jet velocity progression (panel D, mean difference and 95% confidence intervals), and aortic valve area decrease (panel E, mean difference and 95% confidence intervals), peak aortic gradient progression (panel F, mean difference and 95% confidence intervals), and on mean aortic gradient progression (panel G, mean difference and 95% confidence intervals). Squares indicating individual trial differences are scaled according to weighting in the meta-analysis. The width of the diamond for pooled data denotes the lower and upper 95% confidence intervals. Note that the x-axis of panels A-C is logarithmic.

eFigure 2: Meta-analysis of studies that enrolled patients with an LDL-cholesterol  $\leq 130$  mg/dL assessing the effect of statin treatment on aortic stenosis progression in studies: aortic valve area decrease (panel A, mean difference and 95% confidence intervals), peak aortic gradient progression (panel B, mean difference and 95% confidence intervals), and on mean aortic gradient progression (panel C, mean difference and 95% confidence intervals). Squares indicating individual trial differences are scaled according to weighting in the meta-analysis. The width of the diamond for pooled data denotes the lower and upper 95% confidence intervals.

eFigure 3: Meta-regression analysis of studies assessing the effect statin treatment duration on peak aortic-jet velocity progression over time.

eFigure 4: Meta-regression analysis of studies assessing the effect statin treatment duration on aortic valve area decrease over time.

eFigure 1

Forest plots for the outcomes of interest by randomized and non-randomized studies

Panel A

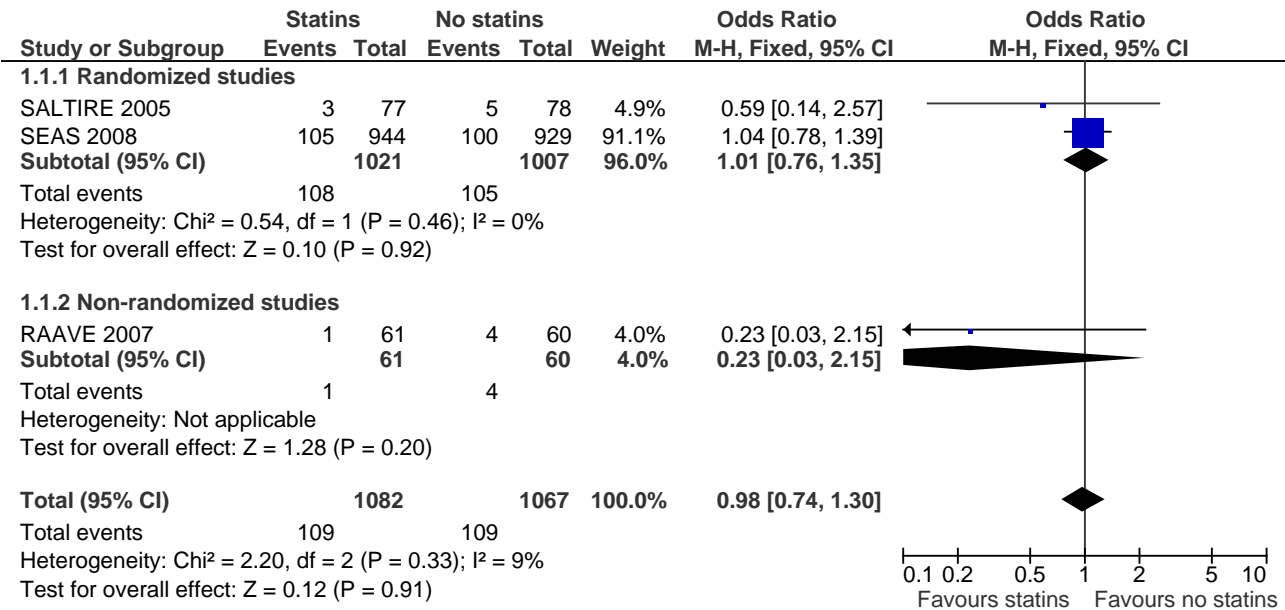

Panel B

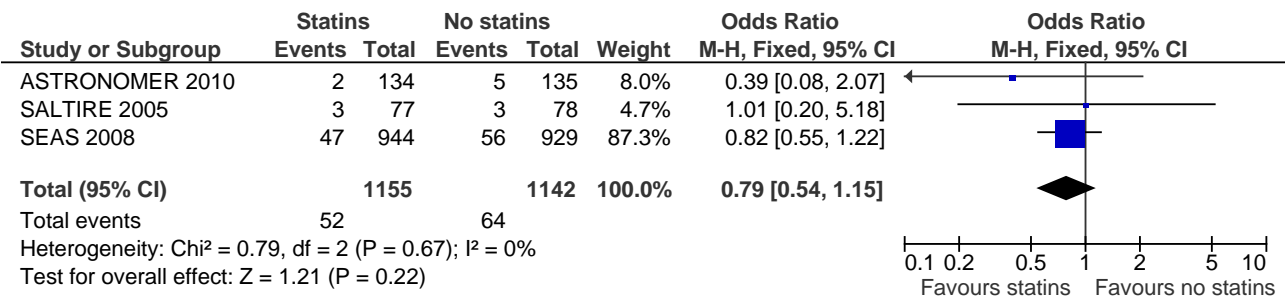

Panel C

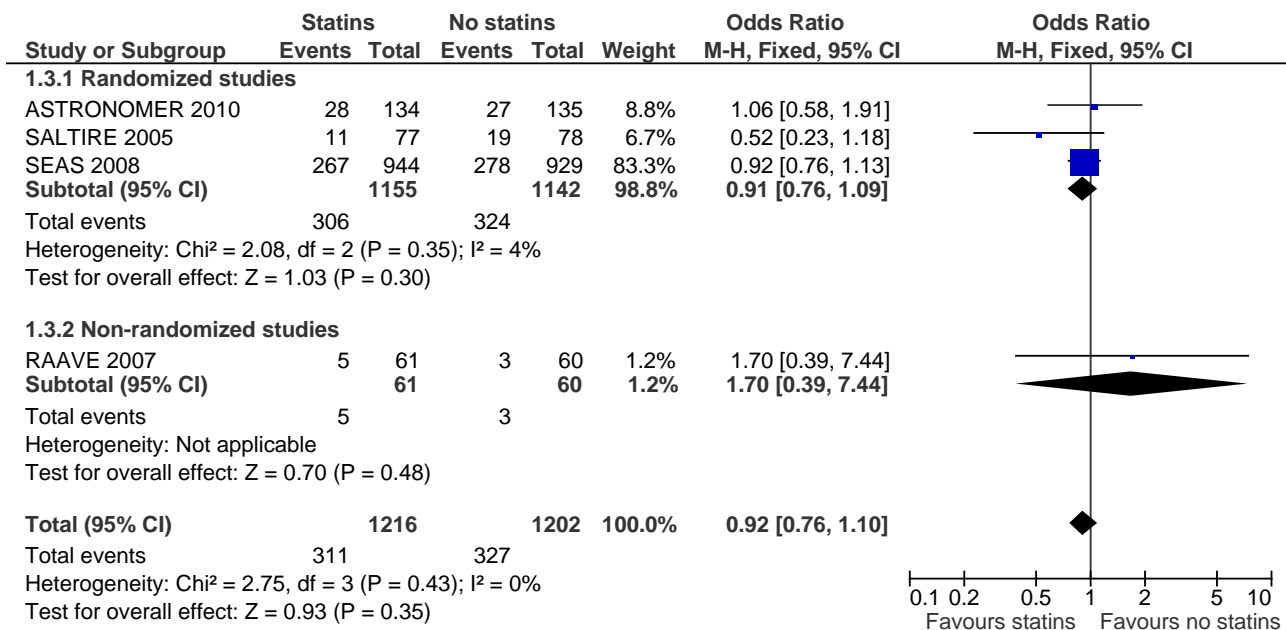

Panel D

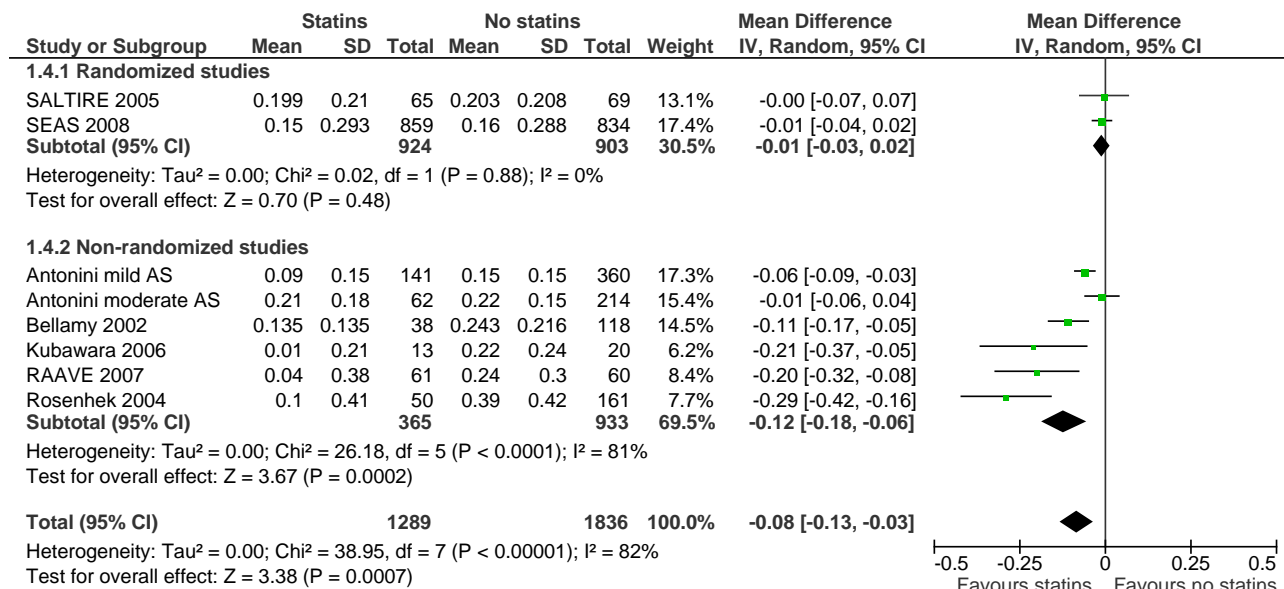

Panel E

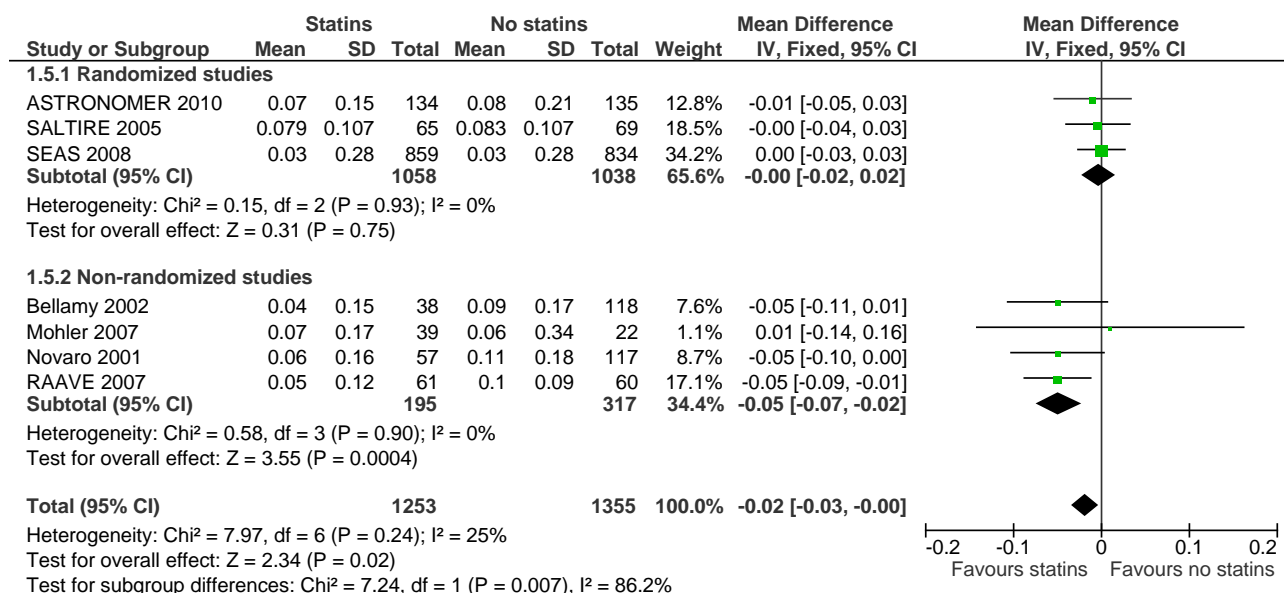

Panel F

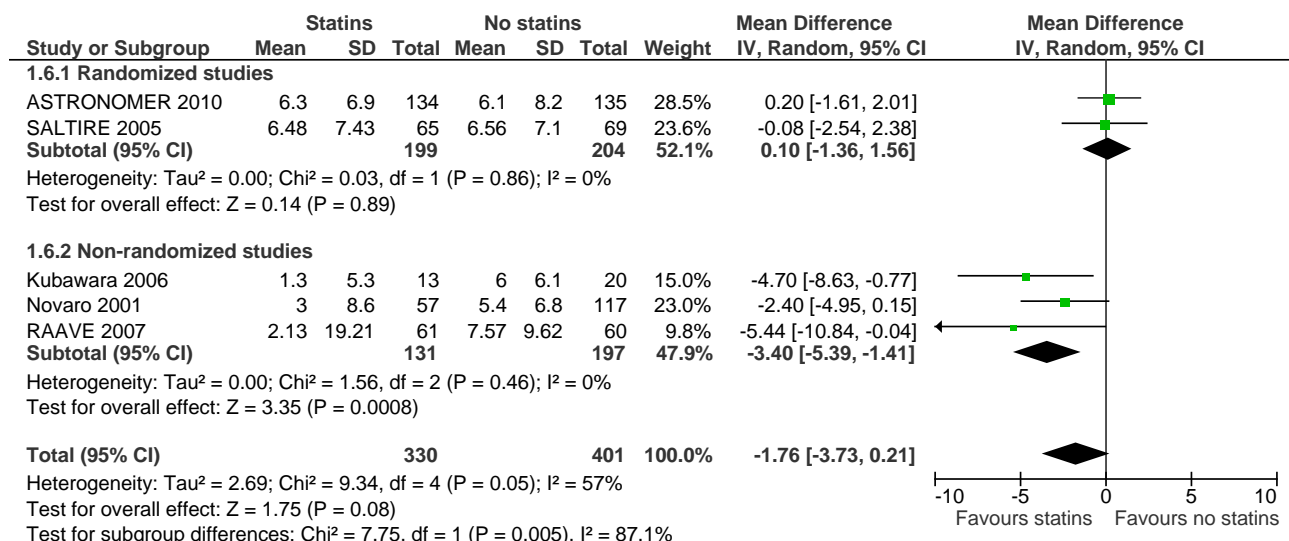

Panel G

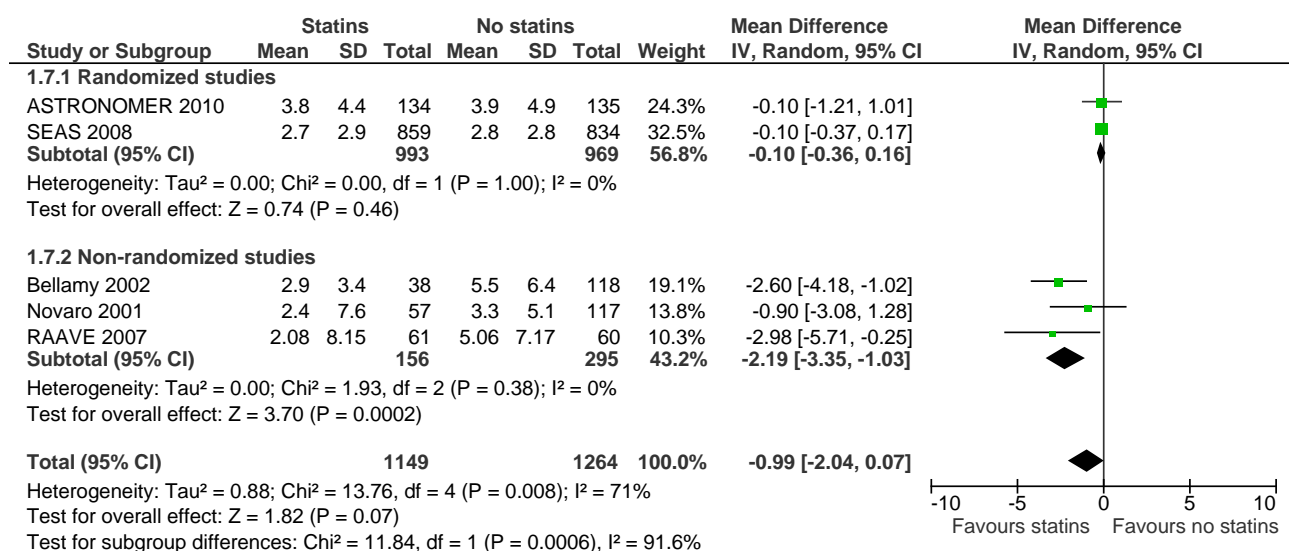

eFigure 2

Forest plots for the parameters of aortic stenosis progression in studies enrolling patients with an average cholesterol level ≤ 130 mg/dL

Panel A

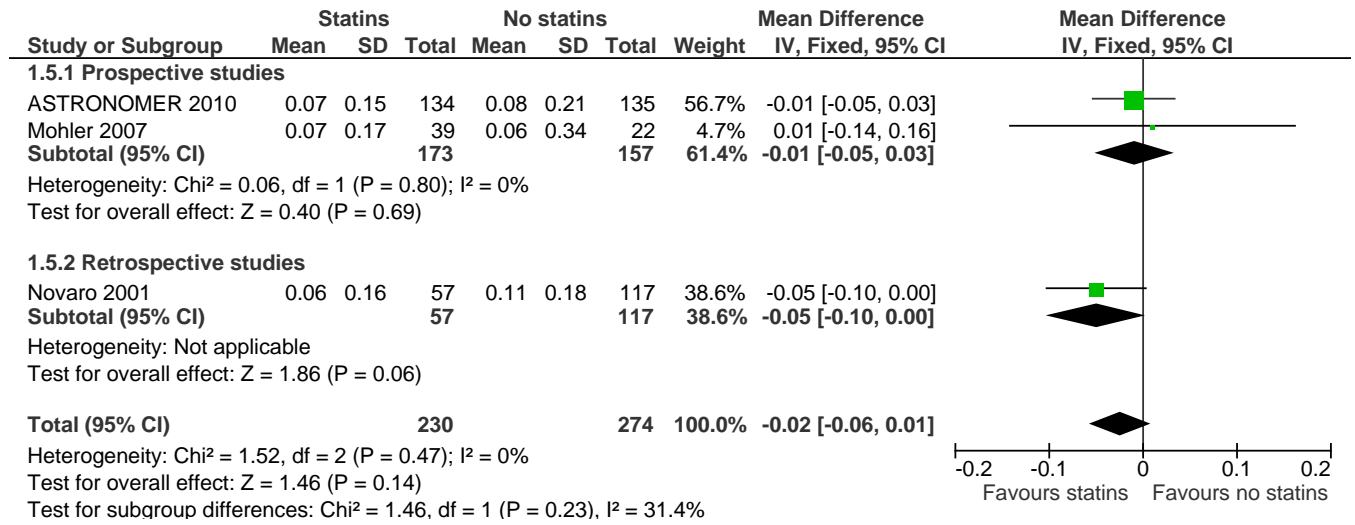

Panel B

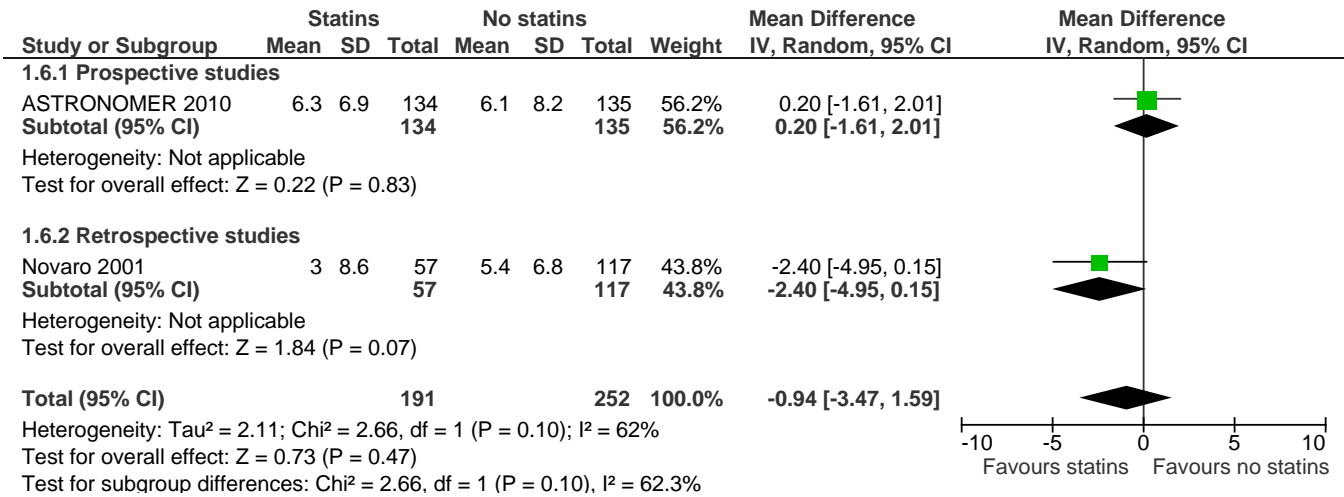

Panel C

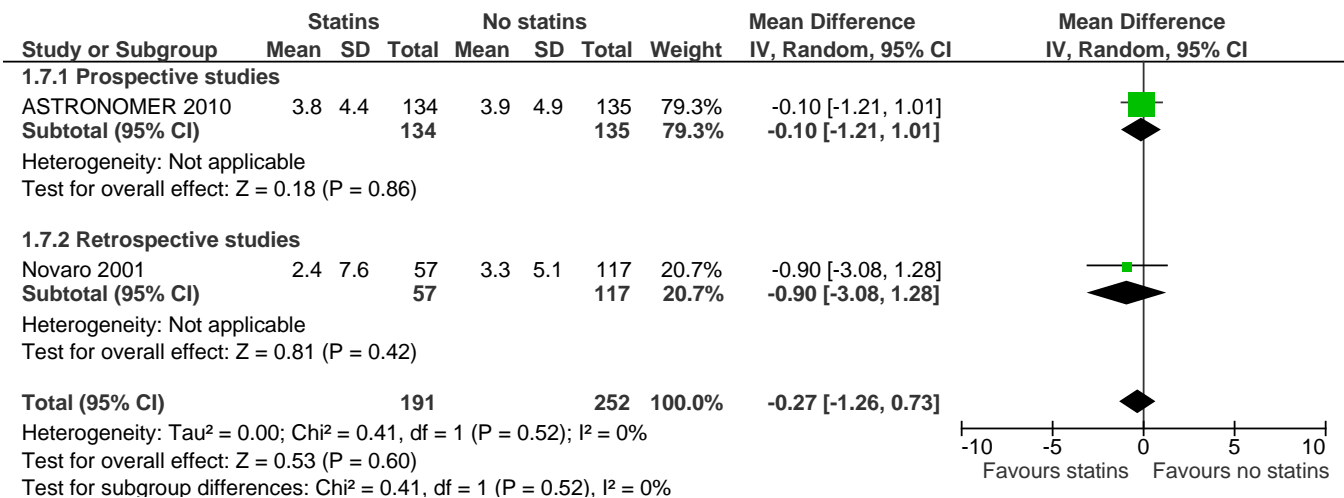



eFigure 3

Bubble plot of the relationship between statin treatment duration and jet velocity progression across time

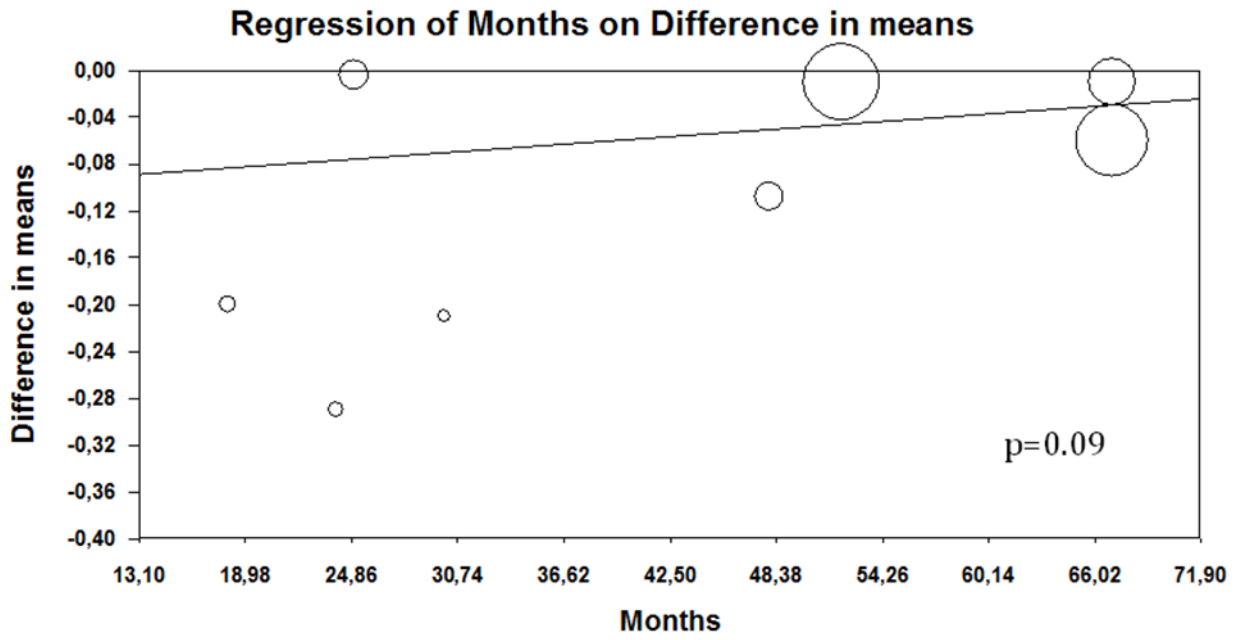

eFigure 4

Bubble plot of the relationship between statin treatment duration and aortic valve area decrease across time

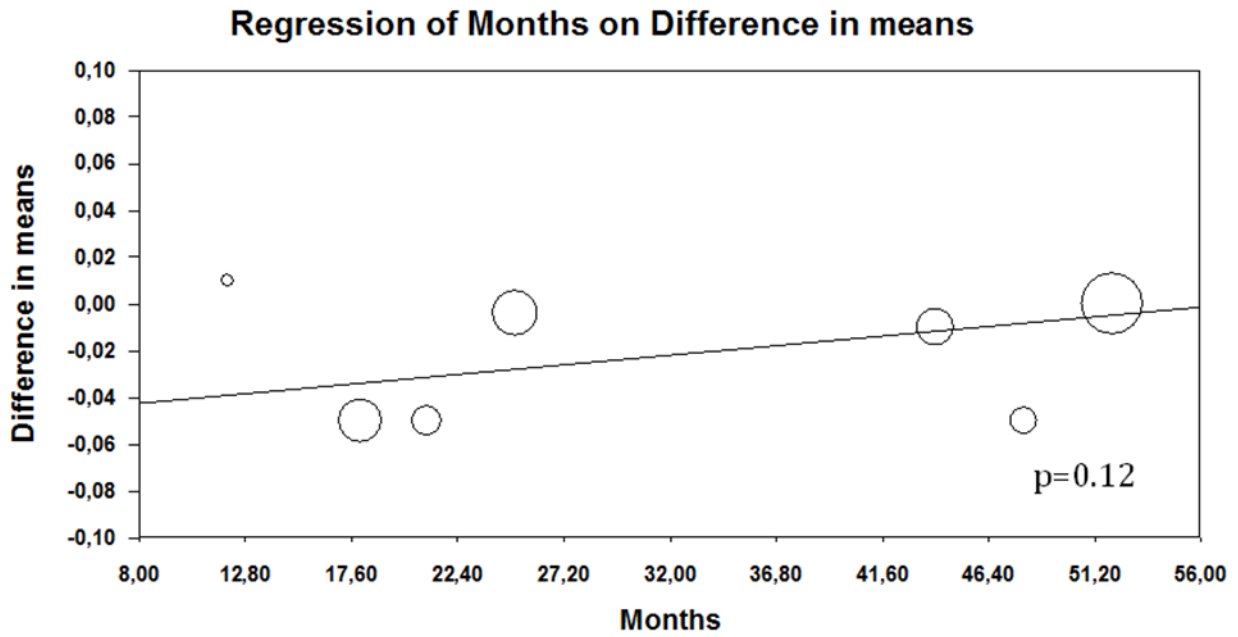

Supplement: HEART_DATA_FIGURES_215046.pdf [file HEART_DATA_FIGURES_215046.pdf]
